# Supplementary material for: Peripheral Oxidation Markers in Down Syndrome Patients: The Better and the Worse
Source: Dis Markers. 2021 Jun 28;2021:5581139. doi: 10.1155/2021/5581139 (PMC8260317; doi:10.1155/2021/5581139)
Supplement: Supplementary Materials — Supplementary Table 1: endogenous enzymes reviewed in this work. Supplementary Table 2: lipid and protein oxidation products reviewed in this work. [file 5581139.f1.zip]

Archive with 2 entries (2 files):
- Table 1  Supplementary.docx
- Table 2 Supplementary.docx
